# Supplementary material for: Measuring decision quality: psychometric evaluation of a new instrument for breast cancer chemotherapy
Source: Springer Nature journal article supplement (doi:10.1186/1472-6947-14-73), 2014-08-20

Figure 1. Knowledge distributions for patient, provider, and control samples

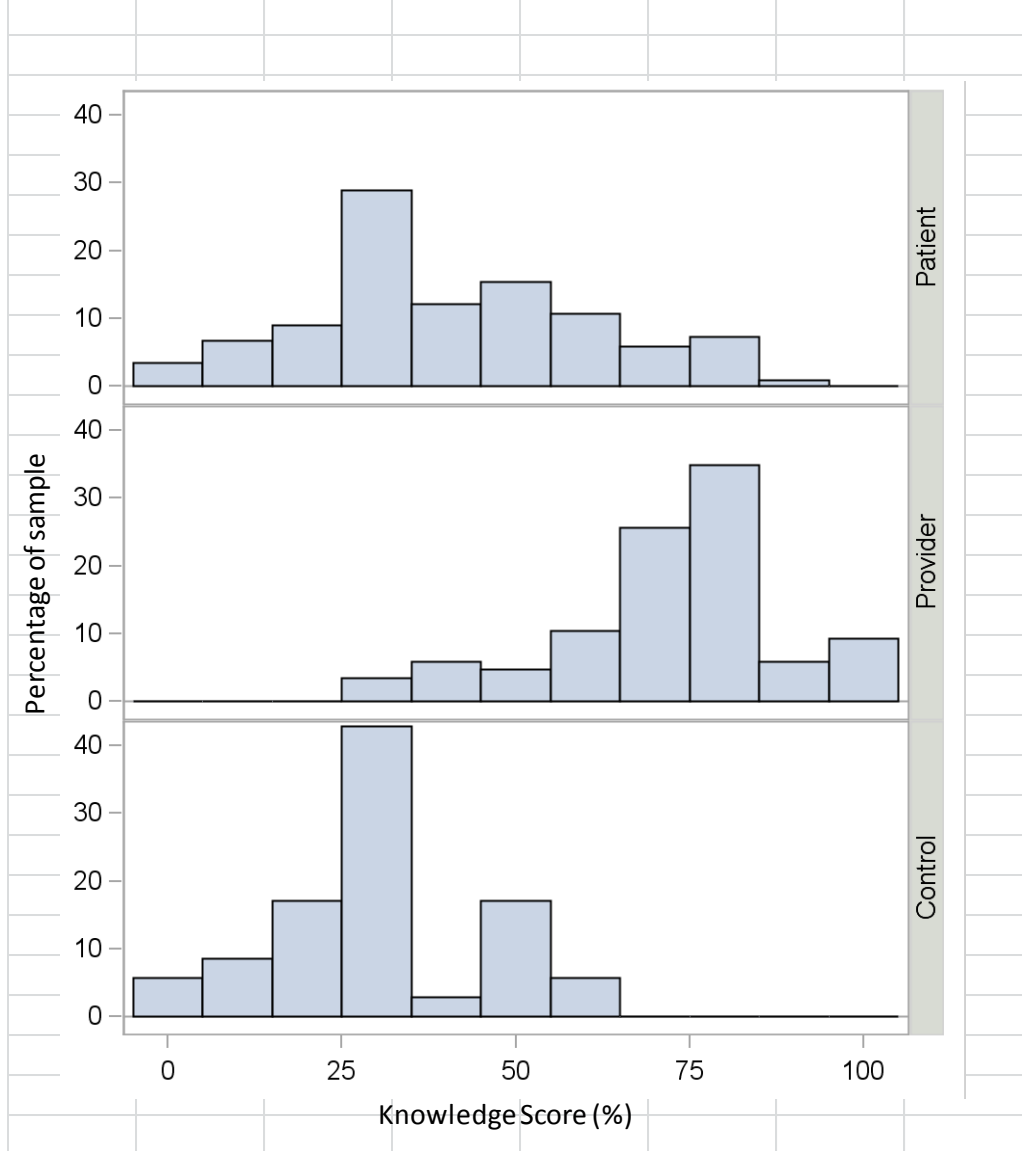

Supplement: 12911_2014_837_MOESM7_ESM.pdf [file 12911_2014_837_MOESM7_ESM.pdf]
